# Supplementary material for: LCZ696 mitigates diabetic-induced nephropathy through inhibiting oxidative stress, NF-κB mediated inflammation and glomerulosclerosis in rats
Source: PeerJ. 2020 Jun 19;8:e9196. doi: 10.7717/peerj.9196 (PMC7307563; doi:10.7717/peerj.9196)
Supplement: Data S1 [file peerj-08-9196-s001.xlsx]

## Sheet: Blood Biochemistry
Parameters / Groups	NC	DC	NV	NSV	DV	DSV
Glucose (mg/dl)	94.503	182.256	84.4255	88.037	135.004	141.755
	63.002	168.755	56.2837	58.6914	92.253	174.381
	102.378	184.506	91.4609	95.3735	132.754	119.129
	86.0653	150.755	76.8875	80.1766	132.754	104.628
	81.5708	191.371	72.8723	75.9896	103.396	105.497
	80.844	190.635	72.223	75.3126	91.277	142.103
Insulin (ng/ml)	NC	DC	NV	NSV	DV	DSV
	1.0993	0.19288	0.982074	1.02408	0.658645	0.86689
	0.97142	0.24996	0.867831	0.904954	0.35361	0.408865
	0.448135	0.28923	0.400347	0.417473	0.81434	0.633975
	0.6285	0.14996	0.561479	0.585497	0.451785	0.451785
	0.6545	0.2988	0.584706	0.609718	0.56898	0.68777
	0.72556	0.258752	0.648188	0.675916	0.655454	0.742515
Creatinine (mg/dl)	NC	DC	NV	NSV	DV	DSV
	9.15934	20.5053	9.55115	10.2526	12.3187	9.10231
	6.10623	20.5053	6.36744	6.8351	12.3187	9.10231
	10.6859	22.2141	11.143	11.9614	15.8452	10.6942
	6.10623	22.2141	6.36744	6.8351	19.8452	15.6942
	7.63278	20.5053	7.95929	8.54388	18.3187	9.10231
	12.2125	27.3974	12.7349	13.6702	20.4759	15.5229
Urea (mg/dl)	NC	DC	NV	NSV	DV	DSV
	13.778	41.3338	12.3087	12.8353	23.9261	25.5057
	12.3893	37.1678	11.0681	11.5416	25.2043	24.6247
	9.68755	29.0626	8.65449	9.02471	25.9635	22.0741
	10.7849	32.3546	9.6348	10.0469	22.9044	20.1408
	10.0222	30.0665	8.95344	9.33645	26.8603	20.0093
	7.74563	23.2369	6.91966	7.21567	20.759	21.647

## Sheet: Serum cytokines
Serum IL-6 (Pg/ml)	NC	DC	NV	NSV	DV	DSV
	195.844	320.46	174.959	182.444	221.904	197.255
	152.922	447.637	136.615	142.459	228.839	196.097
	216.099	210.151	193.055	201.313	179.957	215.377
	164.811	325.988	147.236	153.534	148.906	251.852
	175.34	301.801	156.642	163.343	236.845	154.982
	172.302	338.585	153.928	160.512	171.385	241.728
Serum IL-1B (Pg/ml)	NC	DC	NV	NSV	DV	DSV
	103.469	124.872	92.435	96.3892	110.952	65.4378
	87.8445	214.653	78.4771	81.8341	105.255	139.49
	72.033	132.571	64.3516	67.1044	78.522	89.3939
	96.0618	117.169	85.818	89.4891	120.278	114.407
	98.0484	215.055	87.5928	91.3398	118.422	109.355
	89.8167	169.292	80.2389	83.6714	91.6497	161.963
Serum TNF α (Pg/ml)	NC	DC	NV	NSV	DV	DSV
	67.0633	112.603	59.9119	62.4748	88.4364	77.5113
	73.6276	156.625	65.7761	68.5899	74.9545	73.3097
	89.1456	99.532	79.6393	83.0461	100.911	80.8714
	86.8903	111.64	77.6246	80.9452	78.0835	87.2209
	73.5203	137.829	65.6804	68.49	81.8903	53.6612
	87.0673	77.2541	77.7827	81.11	90.1578	92.5442
Serum IL-10 (Pg/ml)	NC	DC	NV	NSV	DV	DSV
	65.3706	30.901	61.5988	63.2166	64.1548	65.3706
	60.7538	25.8164	57.8454	69.4534	68.7373	75.4736
	58.107	27.5115	51.9106	54.1312	58.107	60.3763
	62.0939	22.9389	55.4724	57.8454	62.0939	67.0691
	60.1073	23.7383	44.2166	45.2525	51.4868	58.107
	64.1628	39.0932	59.4534	49.1411	72.4033	62.0939

## Sheet: Tissue cytokines
Tissue TNF α (Pg / mg protein)	NC	DC	NV	NSV	DV	DSV
	0.686216	1.6703	1.18092	0.959547	0.936489	1.35544
	1.69803	2.32331	1.18832	0.919219	1.02815	1.48811
	0.912169	2.01167	1.39064	1.41027	1.24485	1.80175
	0.889093	2.25639	1.5598	1.58182	1.21336	1.75617
	0.752286	2.78571	0.923169	0.9529	1.02666	1.48594
	0.807313	2.67747	0.879093	1.87702	1.10175	1.59463
Tissue IL-1B (Pg / mg protein)	NC	DC	NV	NSV	DV	DSV
	0.785556	1.47254	1.38556	1.22429	1.07206	1.55166
	0.666935	2.53128	0.656875	1.18021	0.910177	1.31736
	0.546891	2.13009	0.546891	0.70235	0.74635	1.08024
	0.729322	1.88262	0.729322	1.14877	0.995317	1.44059
	0.744406	3.45542	1.07444	1.0057	1.0159	1.47038
	0.924184	2.36047	0.924184	0.840344	1.26125	1.82548
Tissue IL-6 (Pg / mg protein)	NC	DC	NV	NSV	DV	DSV
	1.27203	1.3457	0.951426	1.28541	0.949856	1.14073
	0.993248	2.64959	1.07005	1.43088	0.741683	0.890723
	1.40359	1.69486	1.10886	1.18817	1.0481	1.25871
	1.07047	2.62908	1.81744	1.5431	0.799345	0.959972
	1.13886	2.43401	1.68259	0.785448	0.850414	1.0213
	1.49651	2.15714	1.49119	1.51225	1.11748	1.34203
Tissue NF-kB (Pg / mg protein)	NC	DC	NV	NSV	DV	DSV
	56.1	137.2	70	66.58	76	102.3
	66.8	110	105.5	69.02	53.2	70
	89.8	141	84	89.8	107.7	105.5
	104.6	106.5	111.7	94.6	88.3	84
	73.8	138.1	98.6	73.8	111.3	101.4
	114	176.8	89.1	114	100.8	102

## Sheet: Oxidative stress
TBARS (nmol /mg protein)	NC	DC	NV	NSV	DV	DSV
	19.7337	28.8838	14.1625	3.72556	25.8037	22.9075
	19.5878	42.7094	20.0322	23.5897	28.1549	19.7871
	3.31716	49.7599	3.68379	14.2691	24.4537	16.3553
	20.6968	28.8116	13.1296	9.69123	25.7392	21.8403
	18.5513	42.6026	14.9996	13.5557	38.0595	19.6876
	10.2789	49.6355	13.6496	18.2335	24.3425	16.2394
GSH (nmol /mg protein)	NC	DC	NV	NSV	DV	DSV
	29.5061	23.5234	28.493	28.068	40.8123	39.5942
	33.8939	17.3344	32.0508	30.2968	38.7006	33.8981
	38.7287	22.5196	38.7287	31.7793	36.0862	39.3352
	36.9776	22.6112	36.9776	36.4464	28.3782	27.7656
	33.8092	11.833	33.8092	37.2461	35.878	42.146
	31.0864	22.4633	27.068	26.0055	35.996	39.2368
SOD (U/ mg protein)	NC	DC	NV	NSV	DV	DSV
	27.686	20.304	20.6398	20.2241	25.315	26.8388
	27.9607	23.4069	24.4799	21.947	24.5603	25.1976
	26.0262	21.4083	25.7613	23.9708	25.3131	24.8905
	30.8929	23.1315	21.6475	26.6884	26.0764	30.8317
	25.7249	20.6304	26.3195	30.1033	24.5489	25.2217
	29.7898	23.3948	28.1785	29.2992	25.2998	26.8783
CAT (nmol / min / mg protein)	NC	DC	NV	NSV	DV	DSV
	2.87	0.65025	2.42783	2.45125	2.32783	2.67052
	3.23046	0.301884	2.42569	3.24755	2.42569	2.47112
	2.45	0.479231	3.66908	3.00939	3.66908	3.94924
	3.24755	0.950441	2.44382	3.15015	2.44382	2.66384
	4.16939	0.710299	2.1754	2.37102	2.1754	3.81043
	3.65	0.478032	3.78482	2.43227	3.78482	2.76934
GPx (U / mg protein)	NC	DC	NV	NSV	DV	DSV
	8.72419	4.65	7.45	6.32	5.65	7.74565
	6.76681	2.54	8.085	7.65	8.03804	8.30852
	8.95843	2.25	6.23	6.19076	9.21	9.70844
	8.70237	3.56	7.65	6.62	6.78	8.06633
	6.74989	2.45	9.78584	8.23	8.01794	9.67264
	8.93603	3.778	6.74746	6.25	5.26	6.33661
GST (nmol / min / mg protein)	NC	DC	NV	NSV	DV	DSV
	23.9376	11.6344	25.1376	16.6118	26.5245	27.6895
	25.5924	6.35527	25.5924	23.3628	29.642	26.2452
	17.1685	15.7487	25.1685	24.2409	22.992	35.7191
	23.8778	12.8505	23.8778	23.8831	25.3389	19.4095
	23.6439	16.8308	21.6439	23.713	20.6022	27.3496
	28.4448	14.5363	25.4448	19.621	25.1731	28.6125

## Sheet: Morphometric measurment
Mean Glomerular Volume x 10^6	NC	DC	NV	NSV	DV	DSV
µm^3	0.33	0.7	0.44	0.45	0.5	0.57
	0.58	1.06	0.43	0.48	0.57	0.44
	0.6	1.2	0.74	0.7	0.73	0.51
Leukocyte infiltration(Score 0-4)	NC	DC	NV	NSV	DV	DSV
	0	1	1	0	1	2
	1	2	0	1	1	1
	0	3	0	0	2	0
	0	4	0	1	0	0
	0	2	1	1	1	1
	0	4	1	0	2	1
Glomeruloslerotic index	NC	DC	NV	NSV	DV	DSV
	0.5	0.7	0.6	0.5	0.6	0.5
	0.2	1	0.3	0.4	0.5	0.7
	0.4	1.5	0.5	0.6	0.6	0.8
	0.3	0.8	0.5	0.4	0.7	0.5
	0.5	0.9	0.6	0.7	0.8	0.4
